# Supplementary material for: Did the reporting of prognostic studies of tumour markers improve since the introduction of REMARK guideline? A comparison of reporting in published articles
Source: PubMed Central journal article supplement (PMC5470677; doi:10.1371/journal.pone.0178531), 2017-06-14
Supplement: pone.0178531.s002.pdf [file pone.0178531.s002.pdf]

## S2 Doc: Eligibility criteria for selection of studies

| Criteria: |                                                                                                                                                                                                                                                                                                                                       |
|-----------|---------------------------------------------------------------------------------------------------------------------------------------------------------------------------------------------------------------------------------------------------------------------------------------------------------------------------------------|
| <b>1</b>  | <p><b>“examines the impact of a prognostic marker on a clinical outcome”</b></p> <p>focus on prognostic value of a marker on an outcome of clinical importance in humans</p>                                                                                                                                                          |
| <b>2</b>  | <p><b>“outcome is overall and/or disease-free survival”</b></p> <p>considered outcome is time between diagnosis, study entry or similar and an event such as death, disease-related death, progression, recurrence<br/>           analysis based on survival techniques (Kaplan-Meier, log-rank, Cox/proportional hazard, ...)</p>    |
| <b>3</b>  | <p><b>“study analysis is NOT DNA microarray, gene profiling or proteomic study<br/>           i.e we EXCLUDE DNA microarray”</b></p> <p>excluding any marker study that is related to the analysis of high-dimensional data<br/>           (discovery study)</p>                                                                      |
| <b>4</b>  | <p><b>“single marker is focus of paper”</b></p> <p>focus on analysis of prognostic value of single markers<br/>           excluding studies that try to develop signatures or scores</p>                                                                                                                                              |
| <b>5</b>  | <p><b>“biological marker”</b></p> <p><b>Including:</b> any lab measurement, immunohistochemistry, DNA/RNA measurements, already developed scores (e.g. staging scores)<br/> <b>Excluding:</b> weight (kg), BMI, angiogenesis (ultrasound), any clinical tests such as of reflexes, lymph drainage pattern (Scan), ethnical origin</p> |
| <b>6</b>  | <p><b>“two or more variables included in the model”</b></p> <p>besides biomarker other variable(s) such as known prognostic factors (e.g. age) should be considered in multivariate analysis</p>                                                                                                                                      |
| <b>7</b>  |                                                                                                                                                                                                                                                                                                                                       |
| <b>8</b>  | <p><b>„cancer“</b></p> <p>any form of cancer in humans, except in-situ cancer</p>                                                                                                                                                                                                                                                     |
