# Supplementary material for: Did the reporting of prognostic studies of tumour markers improve since the introduction of REMARK guideline? A comparison of reporting in published articles
Source: PubMed Central journal article supplement (PMC5470677; doi:10.1371/journal.pone.0178531), 2017-06-14
Supplement: pone.0178531.s004.pdf [file pone.0178531.s004.pdf]

**S4 Doc: Data extraction form**

2013-06-18

**Data extraction form**

◆ indicates hidden text entry explaining data extraction sheet. To view use tools, options and tick hidden text box.

**A. Review details**

|                          |  |
|--------------------------|--|
| Reviewer:                |  |
| Date of data extraction: |  |
| Paper number:            |  |
| Author of paper:         |  |
| Year of publication:     |  |
| Journal                  |  |
| Vol and page no          |  |

**Does the article cite REMARK-guidelines (McShane et al., 2005)?**  Yes  No

**B. Inclusion criteria**

| Does the paper fulfil the following criteria:                                                                                                     | Yes | No | Inter-action |
|---------------------------------------------------------------------------------------------------------------------------------------------------|-----|----|--------------|
| ▪ examines the impact of a prognostic marker on a clinical outcome                                                                                |     |    |              |
| ▪ outcome is overall and/or disease-free survival                                                                                                 |     |    |              |
| ▪ study analysis is <b>NOT</b> DNA microarray, gene profiling or proteomic study<br>i.e we <b>EXCLUDE DNA microarray</b> (tissue array may be OK) |     |    |              |
| ▪ single marker is focus of paper                                                                                                                 |     |    |              |
| ▪ biological marker                                                                                                                               |     |    |              |
| ▪ two or more variables included in the model                                                                                                     |     |    |              |
| ▪ multivariate analysis performed                                                                                                                 |     |    |              |
| ▪ cancer                                                                                                                                          |     |    |              |

◆ Definition of biological marker; Int: focus of analysis is on predictive value of the biomarker(interaction analysis with treatment)

**Data extraction**

| C. Characteristics of articles included in review of prognostic studies                                             |               |
|---------------------------------------------------------------------------------------------------------------------|---------------|
| C1 Disease                                                                                                          |               |
| C2 Marker                                                                                                           |               |
| C3 Type of assay used to measure marker<br>[1=immunohistochemistry, 2=ELISA, 3=PCR, 4=microscope not IHC, 5= other] | Specify other |

◆ C3: Tested on a sample of papers and came up with these common options

| C. Study and patient characteristics: Did study report?                                                                                                                                                   | Code | Page number |
|-----------------------------------------------------------------------------------------------------------------------------------------------------------------------------------------------------------|------|-------------|
| C4 Is there any apparent selection other than by type of disease/ time/ place? [1=apparently unselected, 2=selected and give some criteria, 3= unclear]                                                   |      |             |
| C5 Source of patients? [0=no, 1=yes, 2=unclear]                                                                                                                                                           |      |             |
| C6 Stage or grade of patients? [0=no, 1=yes, 2=unclear]                                                                                                                                                   |      |             |
| C7 Age? [0=no, 1=yes, 2=unclear]                                                                                                                                                                          |      |             |
| C8a Treatment? [0=no, 1=yes, 2=unclear]                                                                                                                                                                   |      |             |
| C8b How treatment was determined? [0=not reported, 1=all patients randomized, 2=rule-based -including standardised where all patients get same, 3=partial information - know some treatments but not all] |      |             |
| C9 Participant recruitment - start date? [0=no, 1=yes, 2=unclear]                                                                                                                                         |      |             |
| C10 Participant recruitment - finish date? [0=no, 1=yes, 2=unclear]                                                                                                                                       |      |             |
| C11 Participant recruitment - end of followup date? [0=no, 1=yes, 2=unclear]                                                                                                                              |      |             |
| C12 Median follow-up? [0=no, 1=yes, 2=unclear]                                                                                                                                                            |      |             |
| C13 Comments                                                                                                                                                                                              |      |             |

**S4 Doc: Data extraction sheet (cont.)**

2013-06-18

\* Section C - note we are just interested in whether the following items of data were reported, not in what they are.

| <b>D. Outcomes and statistical analyses</b>               |                                                                                                                                                                                                          | Code | Page number |
|-----------------------------------------------------------|----------------------------------------------------------------------------------------------------------------------------------------------------------------------------------------------------------|------|-------------|
| D1                                                        | Outcomes examined - OS [0=no, 1=yes, 2=unclear]                                                                                                                                                          |      |             |
| D2                                                        | Outcomes examined - DFS [0=no, 1=yes, 2=unclear]                                                                                                                                                         |      |             |
| <b>D. Definition of outcomes and statistical analyses</b> |                                                                                                                                                                                                          | Code | Page number |
| D3                                                        | Overall survival (i.e. death events) [0 = no, 1= explicitly any death, 2= cancer death only, 3 = type of death unclear, 4 = 'overall survival']                                                          |      |             |
| D4                                                        | Disease free survival (DFS)/recurrence/relapse [ 0 = no, 1 = yes DFS including deaths *fill in D3 for type of death even*, 3= yes DFS - not including death, 2 = yes DFS but unclear if deaths included] |      |             |
| D5                                                        | Model used for statistical analysis [0 = none, 1 = Cox, 2 = Weibull, 3 = Artificial Neural Network, 4 = other parametric, 5= trees, 6=other, 7=unclear] * can put in more than one<br>List other .....   |      |             |

**Analysis**

| <b>E Overall numbers provided</b>     |     |    |         |    |   |             |
|---------------------------------------|-----|----|---------|----|---|-------------|
| Number of:                            | Yes | No | Unclear | NA | n | Page number |
| E1 Patients assessed for eligibility  |     |    |         |    |   |             |
| E2 Patients excluded *                | R C |    |         |    |   |             |
| E3 Patients available for analysis    |     |    |         |    |   |             |
| E4 Events (Overall survival OS)       |     |    |         |    |   |             |
| E5 Events (Disease-free survival DFS) |     |    |         |    |   |             |
| E6 Comments                           |     |    |         |    |   |             |

\*note R=reported, C=can be obtained by calculation from reported values

| <b>F Variables</b>                                                        |                                                                  | Code | Page number |
|---------------------------------------------------------------------------|------------------------------------------------------------------|------|-------------|
| F1                                                                        | Number of available variables reported? [0=no, 1=yes, 2=unclear] |      |             |
| <b>F2 List of available variables including baseline characteristics:</b> |                                                                  |      |             |
| 1                                                                         |                                                                  | 8    |             |
| 2                                                                         |                                                                  | 9    |             |
| 3                                                                         |                                                                  | 10   |             |
| 4                                                                         |                                                                  | 11   |             |
| 5                                                                         |                                                                  | 12   |             |
| 6                                                                         |                                                                  | 13   |             |
| 7                                                                         |                                                                  | Rest |             |

| <b>G Univariate analysis of primary prognostic factor</b> |                                    |    |         |    |   |             |
|-----------------------------------------------------------|------------------------------------|----|---------|----|---|-------------|
| Number of:                                                | Yes                                | No | Unclear | NA | n | Page number |
| G1                                                        | Patients for OS                    |    |         |    |   |             |
| G2                                                        | Events for OS                      |    |         |    |   |             |
| G3                                                        | Patients for DFS                   |    |         |    |   |             |
| G4                                                        | Events for DFS                     |    |         |    |   |             |
| G5                                                        | Is effect estimate given (e.g. HR) |    |         |    |   |             |
| G6                                                        | CI given for effect estimate?      |    |         |    |   |             |
| G7                                                        | P-value?                           |    |         |    |   |             |
| G8                                                        | KM graph for groups by factor?     |    |         |    |   |             |
| G9                                                        | Comments                           |    |         |    |   |             |

**S4 Doc: Data extraction sheet (cont.)**

2013-06-18

| <b>H Univariate analysis of other variables analysed</b>                           |     |    |         |    |   |             |
|------------------------------------------------------------------------------------|-----|----|---------|----|---|-------------|
| H1 Numbers in univariate analysis same for all variables (complete case analysis)? | Yes | No | Unclear | NA |   |             |
| Number of:                                                                         | Yes | No | Unclear | NA | n | Page number |
| H2 Patients for OS                                                                 |     |    |         |    |   |             |
| H3 Events for OS                                                                   |     |    |         |    |   |             |
| H4 Patients for DFS                                                                |     |    |         |    |   |             |
| H5 Events for DFS                                                                  |     |    |         |    |   |             |
| H6 Effect estimates given (e.g. HR)                                                |     |    |         |    |   |             |
| H7 CI given for effect estimates?                                                  |     |    |         |    |   |             |
| H8 Comments                                                                        |     |    |         |    |   |             |

\* Give range if numbers are different for different variables

- If the outcome for patient numbers is not specified, then this counts as not reporting patients numbers for outcomes of OS or DFS

| <b>I Multivariate analysis</b>                                                                                                    |               |    |         |    |   | Code | Page number |
|-----------------------------------------------------------------------------------------------------------------------------------|---------------|----|---------|----|---|------|-------------|
| I1a Is more than one multivariate analysis reported? [0=no, 1=yes, 2=unclear]                                                     |               |    |         |    |   |      |             |
| I1b Which multivariate analysis is picked for this data exaction? [Use first analysis mentioned - look at abstract, then results] |               |    |         |    |   |      |             |
| Number of:                                                                                                                        | Yes           | No | Unclear | NA | n | Page |             |
| I1 Patients                                                                                                                       |               |    |         |    |   |      |             |
| I2 Events                                                                                                                         |               |    |         |    |   |      |             |
| I3 Candidate variables in analysis:                                                                                               |               |    |         |    |   |      |             |
| I4 Is effect estimate given for primary marker? (e.g. HR)                                                                         |               |    |         |    |   |      |             |
| I5 Are effect estimates given for other variables in model? (e.g. HR)                                                             | all?<br>some? |    |         |    |   |      |             |
| I6 CI given for effect estimates?                                                                                                 |               |    |         |    |   |      |             |
| I7 P-values?                                                                                                                      | all?<br>some? |    |         |    |   |      |             |
| I8 KM graph for model?                                                                                                            |               |    |         |    |   |      |             |
| I9 Are any assumptions of model examined? e.g. proportional hazards for Cox                                                       |               |    |         |    |   |      |             |
| I10 Comments                                                                                                                      |               |    |         |    |   |      |             |

| <b>J Other</b>                                                                                                                       |  | Code | Page number |
|--------------------------------------------------------------------------------------------------------------------------------------|--|------|-------------|
| J1 Is completeness of followup reported? [0=no, 1=yes, 2=unclear]                                                                    |  |      |             |
| J2 Does the paper show the relationship of the marker to standard prgnostic variables (*item 14 of REMARK)? [0=no, 1=yes, 2=unclear] |  |      |             |

◆ J2:

**K. Data extraction sheet for additional multivariate analyses**

| <b>K Subgroup or additional analyses</b> |     |    |         |    |   |             |
|------------------------------------------|-----|----|---------|----|---|-------------|
| Number of:                               | Yes | No | Unclear | NA | n | Page number |
| K1 Subgroups* of the data analysed?      |     |    |         |    |   |             |
| K2 Other additional analyses?            |     |    |         |    |   |             |
| K2b Report type of other analyses        |     |    |         |    |   |             |

◆ K Comments
