# Supplementary material for: Did the reporting of prognostic studies of tumour markers improve since the introduction of REMARK guideline? A comparison of reporting in published articles
Source: PubMed Central journal article supplement (PMC5470677; doi:10.1371/journal.pone.0178531), 2017-06-14
Supplement: pone.0178531.s005.pdf [file pone.0178531.s005.pdf]

**S5 Doc: Assessed and discarded items of REMARK checklist – Reasons and definitions**

| Item of REMARK checklist                         | Item evaluated | Reason for discard or Definition based on elements of data extraction sheet*                                                                                                                                                                                                                  |
|--------------------------------------------------|----------------|-----------------------------------------------------------------------------------------------------------------------------------------------------------------------------------------------------------------------------------------------------------------------------------------------|
| <b>Introduction</b>                              |                |                                                                                                                                                                                                                                                                                               |
| 1. Introduction: study objectives, hypotheses    | -              | Essentially always mentioned to some extent, especially as some aspects are part of eligibility criteria; in addition, too difficult to assess reliably because it requires background knowledge; this item is not covered by data extraction form                                            |
| <b>Materials and Methods</b>                     |                |                                                                                                                                                                                                                                                                                               |
| 2. Patient characteristics                       | ✓              | <b>Definition:</b> C4 Selection: apparently unselected/selected <b>AND</b> C5 Source: yes                                                                                                                                                                                                     |
| 3. Patient treatments                            | -              | Too difficult to assess because it requires background knowledge on therapy of patients with different cancer diseases and at different stages                                                                                                                                                |
| 4. Specimen characteristics                      | -              | Too difficult to assess because it requires special expertise about lab measurements; moreover, something is always mentioned                                                                                                                                                                 |
| 5. Assay methods                                 | -              | Too difficult to assess because it requires special expertise about lab measurements; moreover, something is always mentioned                                                                                                                                                                 |
| 6. Study design: patient selection & time period | ✓              | <b>Definition:</b> C9 start recruitment: yes <b>AND</b> C10 stop recruitment: yes <b>AND</b> (C11 end of follow up: yes <b>OR</b> C12 median follow up: yes <b>OR</b> J1 completeness of follow up: yes)                                                                                      |
| 7. Clinical endpoints                            | ✓              | <b>Definition:</b> (D1 OS: yes <b>AND</b> D3 definition OS: any death/cancer death) <b>OR</b> (D2 DFS: yes <b>AND</b> D4 definition DFS: incl. death/excl. death)                                                                                                                             |
| 8. Candidate variables                           | -              | Too difficult to assess especially with respect to completeness without background knowledge; some information is always provided                                                                                                                                                             |
| 9. Rationale for sample size                     | ✓              | <b>Definition:</b> ((G1/H2 OS patients (marker/other): both yes) <b>OR</b> (G3/H4 DFS patients (marker/other): both yes)) <b>AND</b> ((G2/H3 OS events (marker/other): both yes) <b>OR</b> (G4/H5 DFS events (marker/other): both yes)) <b>AND</b> I1 patients: yes <b>AND</b> I2 events: yes |
| 10. All statistical methods                      | ✓              | <b>Definition:</b> C5 Model: any stated model (e.g. Cox regression model)                                                                                                                                                                                                                     |
| 11. Handling of the marker                       | -              | Too difficult to assess because it requires background knowledge; definition of marker positivity is usually provided but often without justification                                                                                                                                         |

\* see supplemental document 4 (data extraction sheet) for details (e.g. coding)

**S5 Doc: Assessed and discarded items of REMARK checklist – Reasons and definitions (cont.)**

| Item of REMARK checklist                                      | Item evaluated | Reason for discard or Definition based on elements of data extraction sheet*                                                                                                                                                   |
|---------------------------------------------------------------|----------------|--------------------------------------------------------------------------------------------------------------------------------------------------------------------------------------------------------------------------------|
| <b>Results</b>                                                |                |                                                                                                                                                                                                                                |
| 12. Flow of patients                                          | ✓              | <b>Definition:</b> (E1 patients assessed: yes <b>OR</b> E2 patients excluded: yes) <b>AND</b> E3 analysed patients: yes <b>AND</b> (E4 events OS: yes <b>OR</b> E5 events DFS: yes)                                            |
| 13. Distribution of demographic characteristics               | ✓              | <b>Definition:</b> C6 stage, grade: yes <b>AND</b> C7 age: yes                                                                                                                                                                 |
| 14. Relationship between marker and standard variables        | ✓              | <b>Definition:</b> J2 relationship to other variables: yes                                                                                                                                                                     |
| 15. Univariate analyses                                       | ✓              | <b>Definition:</b> G5 effect estimate of marker: yes <b>AND</b> G6 CI of marker: yes                                                                                                                                           |
| 16. Multivariable analyses                                    | ✓              | Focus: final model<br><b>Definition:</b> I4 effect estimate of marker: yes <b>AND</b> I5 effect estimate of other variables: all/some <b>AND</b> I6 CI of marker and other variables: yes                                      |
| 17. Estimated effects with confidence intervals               | -              | Focus: model including marker <b>AND</b> standard prognostic factors<br>Too difficult to assess without background knowledge regarding standard prognostic factors                                                             |
| 18. Further investigations (incl. check of model assumptions) | -              | Although at least a check of model assumption can be expected such assessments are rarely reported; other investigations cannot generally be expected from all studies as their necessity depends on specific research setting |
| <b>Discussion</b>                                             |                |                                                                                                                                                                                                                                |
| 19. Results in context of pre-specified hypotheses            | -              | Too difficult to assess because it requires specific background knowledge; this item is not covered by data extraction form                                                                                                    |
| 20. Implications                                              | -              | Too difficult to assess because it requires specific background knowledge; this item is not covered by data extraction form                                                                                                    |

\* see supplemental document 4 (data extraction sheet) for details (e.g. coding)
